# Supplementary material for: Helicate-to-tetrahedron transformation of chiral lanthanide supramolecular complexes induced by ionic radii effect and linker length
Source: PubMed Central journal article supplement (PMC9814731; doi:10.1038/s42004-021-00553-8), 2021-08-05
Supplement: 42004_2021_553_MOESM2_ESM.pdf [file 42004_2021_553_MOESM2_ESM.pdf]

## Description of Additional Supplementary Files

**File Name:** Supplementary Data 1

**Description:** X-ray crystallography data of  $\text{Tb}_2(\text{L}2^{\text{SS}})_3$

**File Name:** Supplementary Data 2

**Description:** X-ray crystallography data of  $\text{Eu}_4(\text{L}1^{\text{SS}})_6$
